# Supplementary material
Source: PubMed Central journal article supplement (PMC2708843)

**Supplementary Figure 1: Bulky tags stabilise NGN on N- and C-termini therefore N-terminal blocking may be attempted using cotranslational acetylation.**

(A) Degradation assays in interphase egg extract were performed using NGN, N- or C-terminally Myc-tagged (MT) NGN, as indicated, or NeuroD and analysed by autoradiography (left panels) and quantitative phosphorimage analysis (right graphs). Half-lives for degradation were calculated using first-order kinetics (table).

(B) Acetylation mutant description and prediction of cotranslational acetylation using the online prediction tool Terminator (<http://www.isv.cnrs-gif.fr/Terminator>)

**Supplementary Figure 2: NGN is degraded in an N-terminal-dependent manner through polyubiquitination.**

(A) Degradation assays in interphase egg extract were performed using NGNKO, or the N-terminus deletion mutant  $\Delta 1-20$ NGNKO and analysed by autoradiography (left panels) and quantitative phosphorimage analysis (right graph). Half-lives for degradation were calculated using first-order kinetics (table).

(B) Degradation assays in interphase egg extract were performed using NGNKO, the N-terminal ubiquitin fusion UbNGNKO and the N-terminal lysineless ubiquitin fusion UbKONGNKO and analysed by autoradiography (left panels) and quantitative phosphorimage analysis (right graph). Half-lives for degradation were calculated using first-order kinetics (table).

**Supplementary Figure 3: Single lysine mutants of NGN do not significantly affect NGN protein stability.** Degradation assays were performed in interphase egg extract using the single lysine mutants, as indicated. Half-lives for degradation calculated using first-order kinetics. Errors were calculated as the standard error of the mean from a triplicate data set.

SUPPLEMENTARY FIGURE 1

A

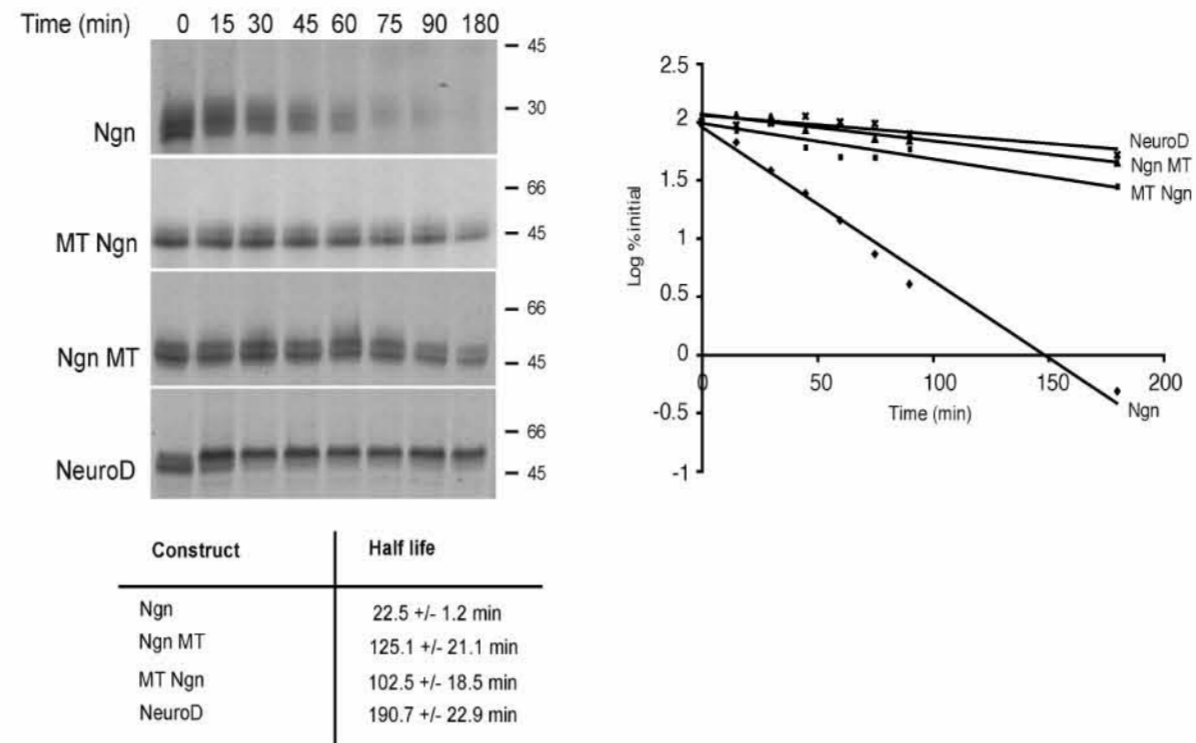

B

| Construct | N-terminal sequence (first 20 amino acids) | Predicted N-terminus of the mature protein | Likelihood (%) |
|-----------|--------------------------------------------|--------------------------------------------|----------------|
| NGN       | MVLLKCEYRDEEEDLTSASP                       | V                                          | 90             |
| Ac1NGN    | MSESKCEYRDEEEDLTSASP                       | Ac-S                                       | 85             |
| Ac2NGN    | MAESKCEYRDEEEDLTSASP                       | Ac-A                                       | 74             |
| Ac3NGN    | MPLLKCEYRDEEEDLTSASP                       | P                                          | 100            |

SUPPLEMENTARY FIGURE 2

A

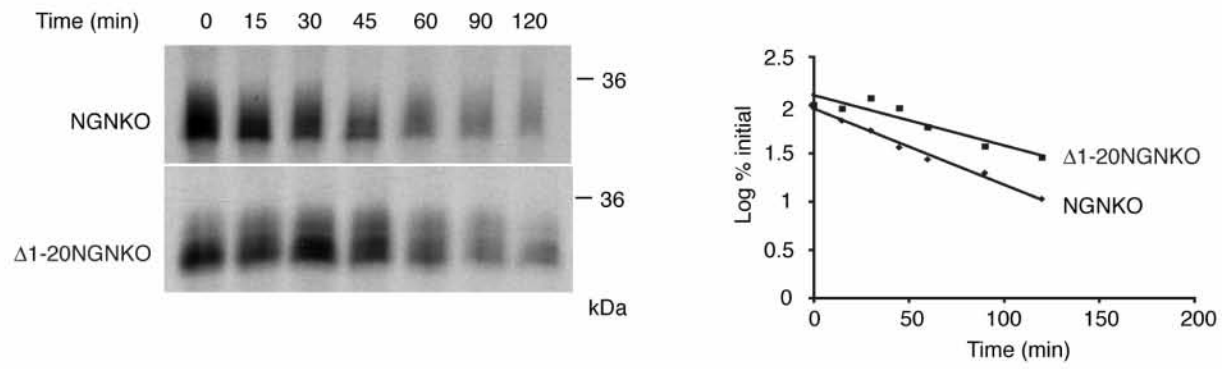

| Construct  | Half life        |
|------------|------------------|
| NGNKO      | 45.3 +/- 4 min   |
| Δ1-20NGNKO | 63.4 +/- 4.4 min |

B

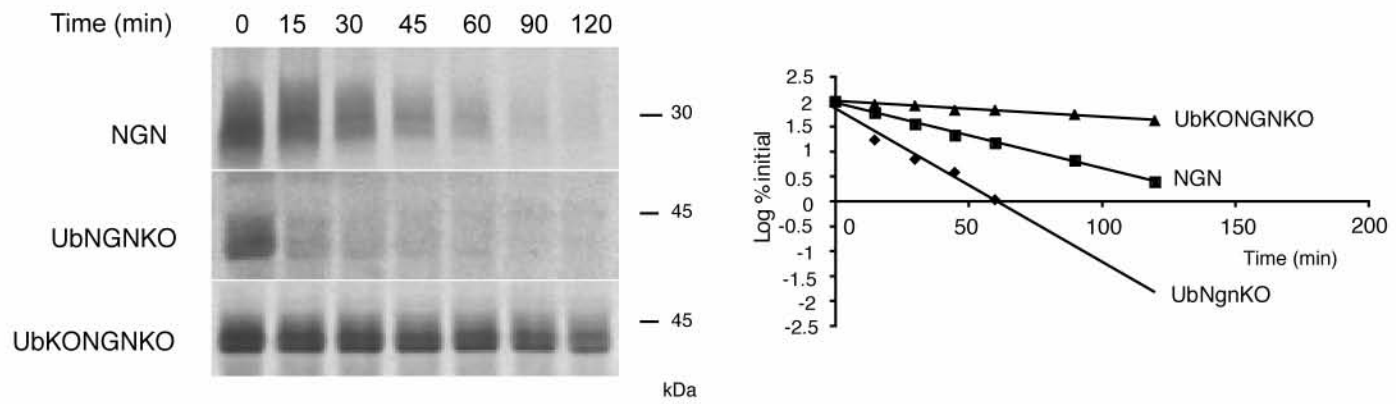

| Construct | Half life          |
|-----------|--------------------|
| Ngn       | 22.5 +/- 1.2 min   |
| UbNGNKO   | 10.5 +/- 1 min     |
| UbKONGNKO | 110.8 +/- 10.7 min |

SUPPLEMENTARY FIGURE 3

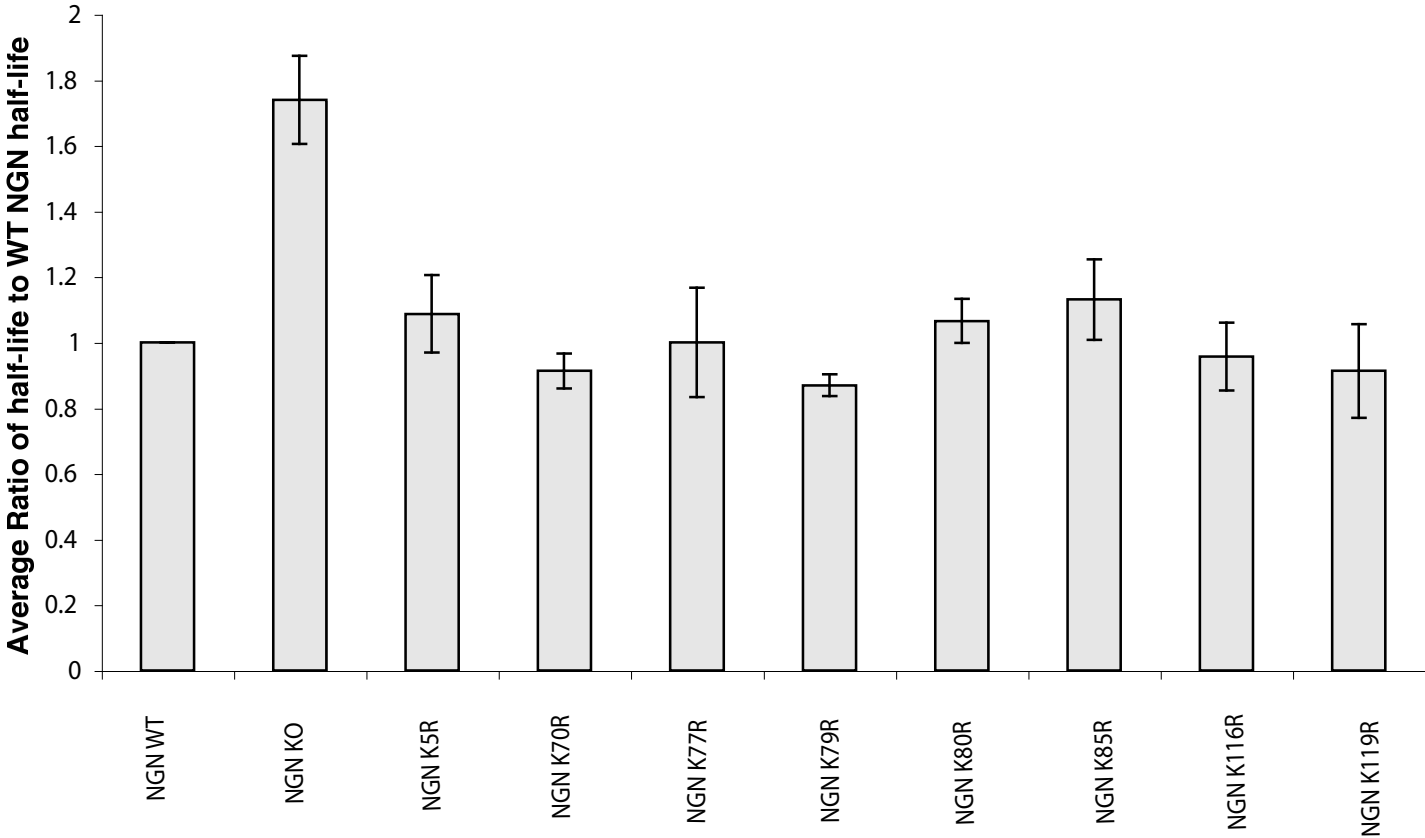

Supplement: supp_M809366200_VosperMarSupplementary.pdf [file supp_M809366200_VosperMarSupplementary.pdf]
